# Supplementary material for: Early Intervention for Diabetes in Medical and Surgical Inpatients Decreases Hyperglycemia and Hospital-Acquired Infections: A Cluster Randomized Trial
Source: Oxford University Press journal article supplement (doi:10.2337/dc18-2342), 2019-03-28
Supplement: dc182342supplementarydata.pdf [file dc182342supplementarydata.pdf]

SUPPLEMENTARY DATA

**Supplementary Figure S1. RAPIDS study design:** Parallel cluster-randomized study with a baseline period. There was a 10-week baseline period, and 12-weeks active period. Light shading represents clusters unexposed to the intervention (i.e. usual care). Dark shading represents clusters exposed to the intervention (i.e. early identification and management). Between weeks 10 to 12 constituted the transition period where implementation of the intervention occurred and no patient recruitment was conducted.

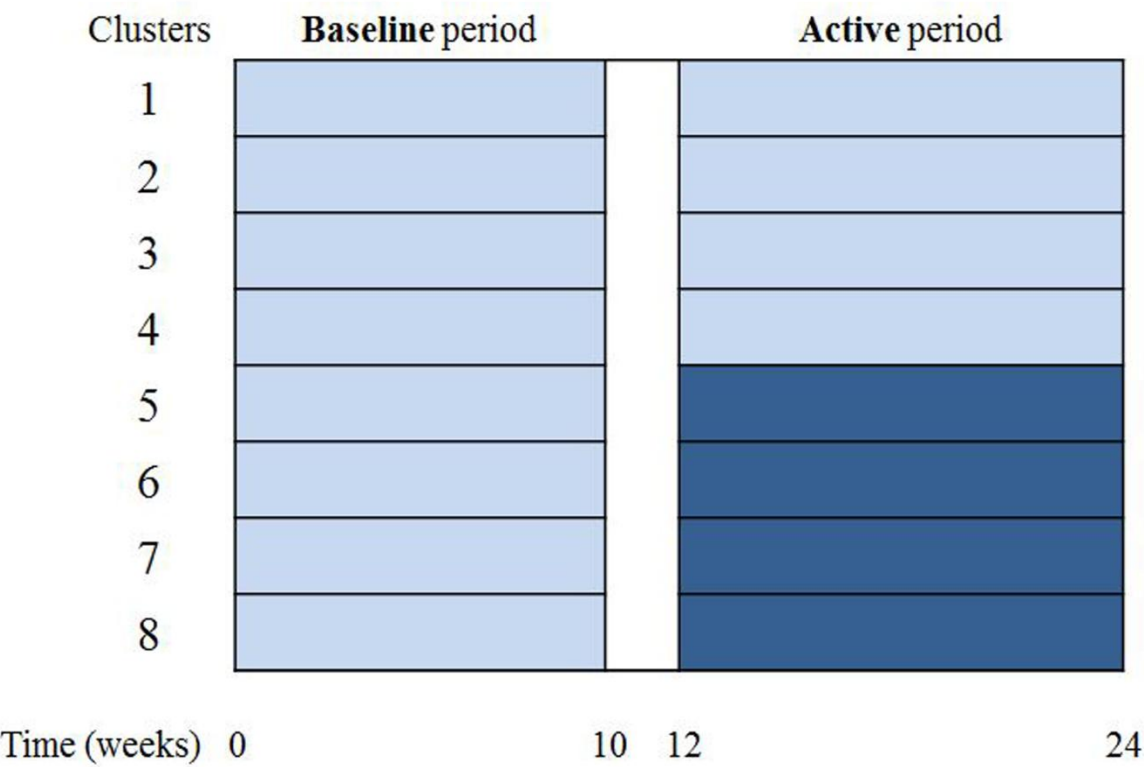

# SUPPLEMENTARY DATA

**Supplementary Table S1. Primary analysis Individual level: Number of Adjusted AGD per-patient.** Mixed model Poisson regression where ward (cluster) was included as random variable. Group (control-baseline period, control-active period, intervention-baseline period, and intervention-active period) was included as a factor to allow simultaneous comparison across treatment arms and between baseline and active periods within each treatment arm. IRR = incidence rate ratio.

|                                             | <b>β-Coefficient (95%CI)</b>   | <b>IRR (95% CI)</b>         | <b>p-value</b> |
|---------------------------------------------|--------------------------------|-----------------------------|----------------|
| Age                                         | 0.009 (0.004, 0.013)           | 1.009 (1.004, 1.013)        | <0.001         |
| Male                                        | 0.102 (-0.017, 0.221)          | 1.107 (0.983, 1.248)        | 0.094          |
| Modified Charlson Index *                   | 0.062 (0.029, 0.094)           | 1.063 (1.029, 1.098)        | <0.001         |
| Creatinine                                  | 0.000 (0.000, 0.001)           | 1.000 (0.999, 1.001)        | 0.553          |
| HbA1c (each % increase)                     | 0.203 (0.174, 0.232)           | 1.225 (1.190, 1.261)        | <0.001         |
| Diabetes Type                               | -0.252 (-0.368, -0.137)        | 0.777 (0.692, 0.872)        | <0.001         |
| Insulin treatment prior to admission        | 0.601 (0.475, 0.727)           | 1.823 (1.607, 2.068)        | <0.001         |
| Surgical unit admission                     | -0.111 (-0.336, 0.133)         | 0.895 (0.701, 1.143)        | 0.372          |
| Elective admission                          | -0.246 (-0.500, 0.008)         | 0.782 (0.606, 1.008)        | 0.057          |
| Surgical ward                               | 0.038 (-0.203, 0.278)          | 1.038 (0.817, 1.320)        | 0.759          |
| Number of observed days                     | 0.148 (0.134, 0.163)           | 1.160 (1.143, 1.177)        | <0.001         |
| Constant                                    | -2.536 (-3.057, -2.014)        | 0.079 (0.047, 0.133)        | <0.001         |
| <b>Ward (random variable)</b>               | 9.37 <sup>-33</sup>            | 0.000                       |                |
| <b>Group</b>                                |                                |                             |                |
| Control-baseline (usual care)               | 0.038 (-0.122, 0.199)          | 1.039 (0.885, 1.220)        | 0.640          |
| Control-active (usual care)                 | -0.056 (-0.217, 0.106)         | 0.946 (0.805, 1.112)        | 0.501          |
| Intervention-baseline (usual care)          | Ref                            | Ref                         |                |
| <b>Intervention-active (proactive care)</b> | <b>-0.283 (-0.453, -0.112)</b> | <b>0.754 (0.636, 0.894)</b> | <b>0.001</b>   |

\* modified Charlson index excludes items related to diabetes

## SUPPLEMENTARY DATA

| Comparison between groups                                                                                              | $\beta$ -coef (95%CI)          | IRR (95%CI)                 | p            |
|------------------------------------------------------------------------------------------------------------------------|--------------------------------|-----------------------------|--------------|
| Control-baseline period vs. Control-active period (change in control arm)                                              | -0.094 (-0.248, +0.060)        | 0.910 (0.780, 1.062)        | 0.233        |
| Intervention-baseline period vs. Intervention-active period (change in intervention arm)                               | <b>-0.283 (-0.453, -0.112)</b> | <b>0.754 (0.636, 0.894)</b> | <b>0.001</b> |
| Control-active period vs. Intervention-active period (comparison of early intervention against parallel control group) | <b>-0.227 (-0.395, -0.059)</b> | <b>0.797 (0.674, 0.942)</b> | <b>0.008</b> |

**Supplementary Table S2.** Adjusted\* Adverse Glycaemic Days per patient during baseline and active periods by clusters

| Control Clusters    | Baseline | Active  | P <sup>#</sup> | Intervention Clusters | Baseline | Active  | P <sup>#</sup> |
|---------------------|----------|---------|----------------|-----------------------|----------|---------|----------------|
| C1-General medicine | 2.0±2.5  | 2.1±2.6 | 0.96           | I1-General Medicine   | 2.2±2.3  | 1.4±1.3 | 0.01           |
| C2-General surgery  | 1.8±1.9  | 1.0±0.6 | 0.05           | I2-General Surgery    | 0.8±0.8  | 0.7±0.5 | 0.40           |
| C3-Cardiology       | 1.6±1.7  | 1.4±1.2 | 0.53           | I3-Neurology          | 1.6±1.4  | 1.1±0.9 | 0.02           |
| C4-Orthopaedic      | 1.6±1.4  | 1.3±1.4 | 0.20           | I4-Neurosurgery       | 0.9±0.8  | 0.8±0.7 | 0.43           |

\*adjusted for age, gender, modified Charlson index, creatinine, HbA1c, insulin treatment prior to admission, admission unit, admission type, ward type, days observed (fixed effects), and ward (random effect)

# Kruskal-Wallis rank-sum test

# SUPPLEMENTARY DATA

**Supplementary Table S3. Post-hoc analysis: Hospital-acquired infections.** Mixed model logistic regression where ward (cluster) was included as random variable. Group (control-baseline period, control-active period, intervention-baseline period, and intervention-active period) was included as a factor to allow simultaneous comparison across treatment arms and between baseline and active periods within each treatment arm.

|                                                              | Adj OR      | 95% CI            | p-value      |
|--------------------------------------------------------------|-------------|-------------------|--------------|
| Age (each 1 year increase)                                   | 1.03        | 1.00, 1.06        | 0.033        |
| Male                                                         | 1.65        | 0.84, 3.25        | 0.143        |
| Modified Charlson Index <sup>#</sup> (each 1 point increase) | 1.08        | 0.90, 1.29        | 0.427        |
| Creatinine (each 10 umol/L increase)                         | 1.00        | 1.00, 1.00        | 0.898        |
| HbA1c (each % increase)                                      | 1.13        | 0.92, 1.38        | 0.239        |
| Diabetes Type                                                |             |                   |              |
| - Type 2 diabetes                                            | 1.00        | ref               | ref          |
| - Type 1 diabetes                                            | 0.35        | 0.04, 3.03        | 0.343        |
| - New hyperglycaemia                                         | 3.79        | 1.12, 12.76       | 0.032        |
| Insulin treatment prior to admission                         | 0.55        | 0.23, 1.34        | 0.188        |
| Surgical unit admission                                      | 0.76        | 0.19, 3.12        | 0.708        |
| Elective admission                                           | 1.50        | 0.47, 4.76        | 0.490        |
| Surgical ward                                                | 1.52        | 0.35, 6.52        | 0.577        |
| Number of observed days (each 1 day increase)                | 1.40        | 1.28, 1.54        | <0.001       |
| Constant                                                     | 0.00        | 0.000, 0.003      | <0.001       |
| Ward (random variable)                                       | 0.08        |                   |              |
| <b>Group</b>                                                 |             |                   |              |
| Control-baseline (usual care)                                | 1.24        | 0.48, 3.14        | 0.654        |
| Control-active (usual care)                                  | 0.89        | 0.34, 2.28        | 0.792        |
| Intervention-baseline (usual care)                           | Ref         | Ref               |              |
| <b>Intervention-active (proactive care)</b>                  | <b>0.20</b> | <b>0.07, 0.58</b> | <b>0.003</b> |

# modified Charlson index excludes items related to diabetes

# SUPPLEMENTARY DATA

| Comparison between groups                                                                                              | Adj OR [95%CI]           | p            |
|------------------------------------------------------------------------------------------------------------------------|--------------------------|--------------|
| Control-baseline period vs. Control-active period (change in control arm)                                              | 0.71 [0.31, 1.63]        | 0.420        |
| Intervention-baseline period vs. Intervention-active period (change in intervention arm)                               | <b>0.20 [0.07, 0.58]</b> | <b>0.003</b> |
| Control-active period vs. Intervention-active period (comparison of early intervention against parallel control group) | <b>0.23 [0.07, 0.73]</b> | <b>0.013</b> |

**Supplementary Table S4. Post-hoc analysis: Hospital-acquired infections (subgroup of patients with type 2 diabetes).** Mixed model logistic regression where ward (cluster) was included as random variable. Group (control-baseline period, control-active period, intervention-baseline period, and intervention-active period) was included as a factor to allow simultaneous comparison across treatment arms and between baseline and active periods within each treatment arm.

|                                                              | Adj OR      | 95% CI            | p-value      |
|--------------------------------------------------------------|-------------|-------------------|--------------|
| Age (each 1 year increase)                                   | 1.04        | 1.01, 1.08        | 0.016        |
| Male                                                         | 1.71        | 0.83, 3.52        | 0.144        |
| Modified Charlson Index <sup>#</sup> (each 1 point increase) | 1.08        | 0.90, 1.31        | 0.409        |
| Creatinine (each 10 umol/L increase)                         | 1.00        | 0.99, 1.00        | 0.680        |
| HbA1c (each % increase)                                      | 1.18        | 0.95, 1.46        | 0.138        |
| Insulin treatment prior to admission                         | 0.47        | 0.18, 1.21        | 0.117        |
| Surgical unit admission                                      | 0.77        | 0.18, 3.33        | 0.729        |
| Elective admission                                           | 1.34        | 0.39, 4.67        | 0.643        |
| Surgical ward                                                | 1.95        | 0.44, 8.62        | 0.378        |
| Number of observed days (each 1 day increase)                | 1.42        | 1.28, 1.56        | <0.001       |
| Constant                                                     | 0.00        | 0.000, 0.002      | <0.001       |
| Ward (random variable)                                       | 0.04        |                   |              |
| <b>Group</b>                                                 |             |                   |              |
| Control-baseline (usual care)                                | 1.37        | 0.55, 3.39        | 0.497        |
| Control-active (usual care)                                  | 0.67        | 0.25, 1.78        | 0.420        |
| Intervention-baseline (usual care)                           | Ref         | Ref               |              |
| <b>Intervention-active (proactive care)</b>                  | <b>0.17</b> | <b>0.05, 0.56</b> | <b>0.003</b> |

# modified Charlson index excludes items related to diabetes

# SUPPLEMENTARY DATA

| Comparison between groups                                                                                              | Adj OR [95%CI]           | p            |
|------------------------------------------------------------------------------------------------------------------------|--------------------------|--------------|
| Control-baseline period vs. Control-active period (change in control arm)                                              | 0.49 [0.20, 1.19]        | 0.114        |
| Intervention-baseline period vs. Intervention-active period (change in intervention arm)                               | <b>0.17 [0.05, 0.56]</b> | <b>0.003</b> |
| Control-active period vs. Intervention-active period (comparison of early intervention against parallel control group) | <b>0.26 [0.08, 0.89]</b> | <b>0.033</b> |

**Supplementary Table S5. Glycaemic and Clinical outcomes for subgroup of patients with Type 2 diabetes**

|                                   | Control arm (4 clusters) |               |      | Intervention arm (4 clusters) |                                |                  |
|-----------------------------------|--------------------------|---------------|------|-------------------------------|--------------------------------|------------------|
|                                   | Baseline Period          | Active Period | p    | Baseline Period               | Active Period                  | p                |
|                                   | (usual care)             | (usual care)  |      | (usual care)                  | (Early/proactive intervention) |                  |
| <b>Glucometric outcomes</b>       |                          |               |      |                               |                                |                  |
| <b>Patient-days</b>               | <b>n=1131</b>            | <b>n=1264</b> |      | <b>n=1053</b>                 | <b>n=1396</b>                  |                  |
| Patient-day mean BG (mean±sd)     | 9.6±3.3                  | 9.4±3.1       | 0.10 | 9.2±3.2                       | 9.0±2.7                        | 0.296            |
| mean BG > 10 mmol/L [>180 mg/dL]  | 36%                      | 36%           | 0.90 | 32%                           | 30%                            | 0.370            |
| mean BG > 15 mmol/L [>270 mg/dL]  | 7.0%                     | 5.6%          | 0.18 | <b>6.6%</b>                   | <b>3.2%</b>                    | <b>&lt;0.001</b> |
| BG <4 mmol/L [<72 mg/dL]          | 4.3%                     | 4.1%          | 0.79 | 3.0%                          | 3.9%                           | 0.27             |
| BG <3 mmol/L [<54 mg/dL]          | 1.0%                     | 1.0%          | 0.89 | 0.7%                          | 0.4%                           | 0.42             |
| <b>Clinical outcomes</b>          |                          |               |      |                               |                                |                  |
| <b>Patients</b>                   | <b>n=193</b>             | <b>n=241</b>  |      | <b>n=190</b>                  | <b>n=247</b>                   |                  |
| Any hospital-acquired infection   | 18 (9.3)                 | 16 (6.4)      | 0.37 | <b>13 (6.8)</b>               | <b>6 (2.4)</b>                 | <b>0.032</b>     |
| Acute kidney injury               | 14 (7.3)                 | 19 (7.9)      | 0.86 | 11 (5.8)                      | 9 (3.7)                        | 0.36             |
| Acute myocardial infarct          | 3 (1.6)                  | 4 (1.7)       | 0.99 | 2 (1.1)                       | 1 (0.4)                        | 0.58             |
| Unplanned critical care admission | 10 (5.1)                 | 9 (3.7)       | 0.49 | 2 (1.1)                       | 2 (0.8)                        | 0.99             |
| Hospital mortality                | 3 (1.6)                  | 7 (2.9)       | 0.52 | 5 (2.6)                       | 4 (1.6)                        | 0.51             |
| Composite outcome                 | 35 (18.1)                | 43 (17.8)     | 0.99 | 26 (13.7)                     | 21 (8.5)                       | 0.09             |
| Length of stay (days)             | 6 (3, 11)                | 6 (3, 10)     | 0.47 | 5 (3, 10)                     | 6 (3, 11)                      | 0.14             |

Data expressed as mean±sd, median (Q1, Q3), or n (%). P-values using t-test or Fisher's exact test as appropriate

SUPPLEMENTARY DATA

**Supplementary Table S6. Glycaemic and clinical outcomes for subgroup of patients with Type 1 diabetes**

|                                   | Control arm (4 clusters) |               |      | Intervention arm (4 clusters) |                                |             |
|-----------------------------------|--------------------------|---------------|------|-------------------------------|--------------------------------|-------------|
|                                   | Baseline Period          | Active Period | p    | Baseline Period               | Active Period                  | p           |
|                                   | (usual care)             | (usual care)  |      | (usual care)                  | (Early/proactive intervention) |             |
| <b>Glucometric outcomes</b>       |                          |               |      |                               |                                |             |
| <b>Patient-days</b>               | <b>n=55</b>              | <b>n=53</b>   |      | <b>n=34</b>                   | <b>n=28</b>                    |             |
| Patient-day mean BG (mean±sd)     | 10.6±3.1                 | 10.5±3.0      | 0.88 | <b>10.3±3.2</b>               | <b>10.7±3.3</b>                | <b>0.64</b> |
| mean BG > 10 mmol/L [>180 mg/dL]  | 60%                      | 57%           | 0.72 | 44%                           | 54%                            | 0.61        |
| mean BG > 15 mmol/L [>270 mg/dL]  | 9.1%                     | 7.6%          | 0.99 | 15%                           | 14%                            | 0.99        |
| BG <4 mmol/L [<72 mg/dL]          | 22%                      | 13%           | 0.31 | 29%                           | 32%                            | 0.82        |
| BG <3 mmol/L [<54 mg/dL]          | 11%                      | 4%            | 0.27 | 12%                           | 17%                            | 0.72        |
| <b>Clinical outcomes</b>          |                          |               |      |                               |                                |             |
| <b>Patients</b>                   | <b>n=18</b>              | <b>n=19</b>   |      | <b>n=16</b>                   | <b>n=12</b>                    |             |
| Any hospital-acquired infection   | 0                        | 0             |      | 1 (6)                         | 0                              | 0.99        |
| Acute kidney injury               | 0                        | 2 (11)        | 0.49 | 0                             | 0                              |             |
| Acute myocardial infarct          | 1 (6)                    | 0             | 0.49 | 0                             | 0                              |             |
| Unplanned critical care admission | 2 (11)                   | 1 (5)         | 0.60 | 0                             | 0                              |             |
| Hospital mortality                | 0                        | 1 (5)         | 0.99 | 0                             | 0                              |             |
| Composite outcome                 | 2 (11)                   | 4 (21)        | 0.66 | 1 (6)                         | 0                              | 0.99        |
| Length of stay (days)             | 5 (3, 13)                | 4 (3, 9)      | 0.64 | 4 (2, 14)                     | 5 (3, 5)                       | 0.59        |

Data expressed as mean±sd, median (Q1, Q3), or n (%). P-values using t-test or Fisher's exact test as appropriate

SUPPLEMENTARY DATA

**Supplementary Table S7. Glycaemic and clinical outcomes for subgroup of patients with New Hyperglycaemia**

|                                   | Control arm (4 clusters) |               |             | Intervention arm (4 clusters) |                                |                  |
|-----------------------------------|--------------------------|---------------|-------------|-------------------------------|--------------------------------|------------------|
|                                   | Baseline Period          | Active Period | p           | Baseline Period               | Active Period                  | p                |
|                                   | (usual care)             | (usual care)  |             | (usual care)                  | (Early/proactive intervention) |                  |
| <b>Glucometric outcomes</b>       |                          |               |             |                               |                                |                  |
| <b>Patient-days</b>               | <b>n=53</b>              | <b>n=48</b>   |             | <b>n=46</b>                   | <b>n=139</b>                   |                  |
| Patient-day mean BG (mean±sd)     | 9.3±2.5                  | 9.9±3.9       | 0.35        | <b>11.3±4.1</b>               | <b>8.7±2.5</b>                 | <b>&lt;0.001</b> |
| mean BG > 10 mmol/L [>180 mg/dL]  | 32%                      | 38%           | 0.57        | <b>48%</b>                    | <b>22%</b>                     | <b>0.001</b>     |
| mean BG > 15 mmol/L [>270 mg/dL]  | <b>1.9%</b>              | <b>14.6%</b>  | <b>0.03</b> | <b>17.4%</b>                  | <b>2.2%</b>                    | <b>0.001</b>     |
| BG <4 mmol/L [<72 mg/dL]          | 0                        | 2.1%          | 0.47        | 0                             | 0                              |                  |
| BG <3 mmol/L [<54 mg/dL]          | 0                        | 0             |             | 0                             | 0                              |                  |
| <b>Clinical outcomes</b>          |                          |               |             |                               |                                |                  |
| <b>Patients</b>                   | <b>n=10</b>              | <b>n=10</b>   |             | <b>n=14</b>                   | <b>n=28</b>                    |                  |
| Any hospital-acquired infection   | 1 (10)                   | 3 (30)        | 0.59        | 0                             | 1 (4)                          | 0.99             |
| Acute kidney injury               | 1 (10)                   | 1 (10)        | 0.99        | 0                             | 2 (7)                          | 0.55             |
| Acute myocardial infarct          | 0                        | 1 (10)        | 0.99        | 0                             | 0                              |                  |
| Unplanned critical care admission | 0                        | 2 (20)        | 0.47        | 0                             | 1 (4)                          | 0.99             |
| Hospital mortality                | 2 (20)                   | 0             | 0.47        | 1 (7)                         | 2 (7)                          | 0.99             |
| Composite outcome                 | 2 (20)                   | 4 (40)        | 0.63        | 1 (7)                         | 5 (18)                         | 0.65             |
| Length of stay (days)             | 5 (3, 7)                 | 11 (4, 18)    | 0.31        | 7 (4, 11)                     | 7 (3, 10)                      | 0.97             |

Data expressed as mean±sd, median (Q1, Q3), or n (%). P-values using t-test or Fisher's exact test as appropriate



SUPPLEMENTARY DATA

**Supplementary Table S8. Subgroup analysis of clinical outcomes: medical vs. surgical patients**

|                                   | Control arm (4 clusters) |               |           | Intervention arm (4 clusters) |                                |              |
|-----------------------------------|--------------------------|---------------|-----------|-------------------------------|--------------------------------|--------------|
|                                   | Baseline Period          | Active Period | p         | Baseline Period               | Active Period                  | p            |
|                                   | (usual care)             | (usual care)  |           | (usual care)                  | (Early/proactive intervention) |              |
| <b>Medical Patients</b>           | <b>n=168</b>             | <b>n=194</b>  | <b>p*</b> | <b>n=114</b>                  | <b>n=169</b>                   | <b>p*</b>    |
| Any hospital-acquired infection   | 12 (7.1)                 | 9 (4.6)       | 0.37      | <b>12 (10.5)</b>              | <b>6 (3.6)</b>                 | <b>0.025</b> |
| Acute kidney injury               | 12 (7.1)                 | 12 (8.3)      | 0.84      | 9 (7.9)                       | 7 (4.1)                        | 0.20         |
| Acute myocardial infarct          | 2 (1.9)                  | 4 (2.1)       | 0.69      | 1 (0.9)                       | 1 (0.6)                        | 0.99         |
| Unplanned critical care admission | 9 (5.4)                  | 9 (4.6)       | 0.81      | 1 (0.9)                       | 2 (1.2)                        | 0.99         |
| Hospital mortality                | 5 (3.0)                  | 8 (4.1)       | 0.59      | 5 (4.4)                       | 6 (3.6)                        | 0.76         |
| Composite outcome                 | 28 (16.7)                | 38 (19.6)     | 0.50      | 24 (21.1)                     | 21 (12.4)                      | 0.07         |
| Length of stay (days)             | 5 (3, 10)                | 6 (3, 12)     | 0.54      | 8 (4, 12)                     | 8 (4, 14)                      | 0.44         |
| <b>Surgical Patients</b>          | <b>n=53</b>              | <b>n=76</b>   |           | <b>n=106</b>                  | <b>n=122</b>                   |              |
| Any hospital-acquired infection   | 7 (13.2)                 | 10 (13.2)     | 0.99      | 2 (1.9)                       | 1 (0.8)                        | 0.60         |
| Acute kidney injury               | 3 (5.7)                  | 6 (7.9)       | 0.73      | 2 (1.9)                       | 4 (3.3)                        | 0.69         |
| Acute myocardial infarct          | 2 (3.8)                  | 1 (1.3)       | 0.57      | 1 (0.9)                       | 0                              | 0.46         |
| Unplanned critical care admission | 3 (5.7)                  | 3 (4.0)       | 0.69      | 1 (0.9)                       | 1 (0.8)                        | 0.99         |
| Hospital mortality                | 0                        | 0             |           | 1 (9.4)                       | 0                              | 0.46         |
| Composite outcome                 | 11 (20.8)                | 13 (17.1)     | 0.65      | 4 (3.8)                       | 5 (4.1)                        | 0.99         |
| Length of stay (days)             | 9 (4, 14)                | 5 (4, 9)      | 0.03      | 4 (2, 7)                      | 5 (2, 7)                       | 0.51         |

Data expressed as mean±sd, median (Q1, Q3), or n (%). P-values using Fisher's exact test.

SUPPLEMENTARY DATA

**Supplementary Table S9. Insulin-naïve patients that received insulin treatment in hospital**

|                                         | Control arm (4 clusters) |                    | Intervention arm (4 clusters) |                                    |
|-----------------------------------------|--------------------------|--------------------|-------------------------------|------------------------------------|
|                                         | Baseline<br>Period       | Active<br>Period   | Baseline<br>Period            | Active Period                      |
|                                         | (Usual care)             | (Usual care)       | (Usual care)                  | (Early/ proactive<br>intervention) |
| <b>Medical units</b>                    |                          |                    |                               |                                    |
| - General medicine                      | 12/34 (35)               | 17/40 (43)         | 18/42 (43)                    | 47/67 (70)                         |
| - Cardiology                            | 13/41 (32)               | 25/61 (41)         | 0/0                           | 1/1 (100)                          |
| - Neurology                             | 0/0                      | 1/3 (33)           | 15/39 (39)                    | 30/56 (54)                         |
| - Respiratory                           | 11/19 (58)               | 7/14 (50)          | 0/0                           | 0/1 (0)                            |
| - Gastroenterology                      | 4/10 (40)                | 3/6 (50)           | 1/2 (50)                      | 0/4 (0)                            |
| - Other medical                         | 1/3 (33)                 | 1/1 (100)          | 1/3 (33)                      | 0/0                                |
| <b>Surgical units</b>                   |                          |                    |                               |                                    |
| - Abdominal & emergency general surgery | 3/11 (27)                | 9/16 (56)          | 8/36 (22)                     | 28/52 (50)                         |
| - Neurosurgery                          | 0/0                      | 0/0                | 11/34 (32)                    | 17/32 (53)                         |
| - Orthopedics & Trauma                  | 7/24 (29)                | 7/33 (21)          | 2/7 (29)                      | 3/5 (60)                           |
| - Other surgery                         | 0/0                      | 0/2 (0)            | 1/6 (17)                      | 1/3 (33)                           |
| <b>TOTAL</b>                            | <b>51/142 (36)</b>       | <b>70/176 (40)</b> | <b>57/169 (34)</b>            | <b>127/221 (57)</b>                |

Data presented as: number that received insulin / total number of patients (percentage)
